# Supplementary material for: Design, Synthesis, and Bioassay of 2′-Modified Kanamycin A
Source: MDPI journal article supplement (doi:10.3390/molecules27217482), 2022-11-02

# **Design, synthesis, and bioassay of 2'-modified kanamycin A**

**YAN Ribai <sup>1,\*</sup>, LI Xiaonan <sup>1</sup>, LIU Yuheng <sup>2</sup>, YE Xinshan <sup>1,\*</sup>**

## **NMR Spetra**

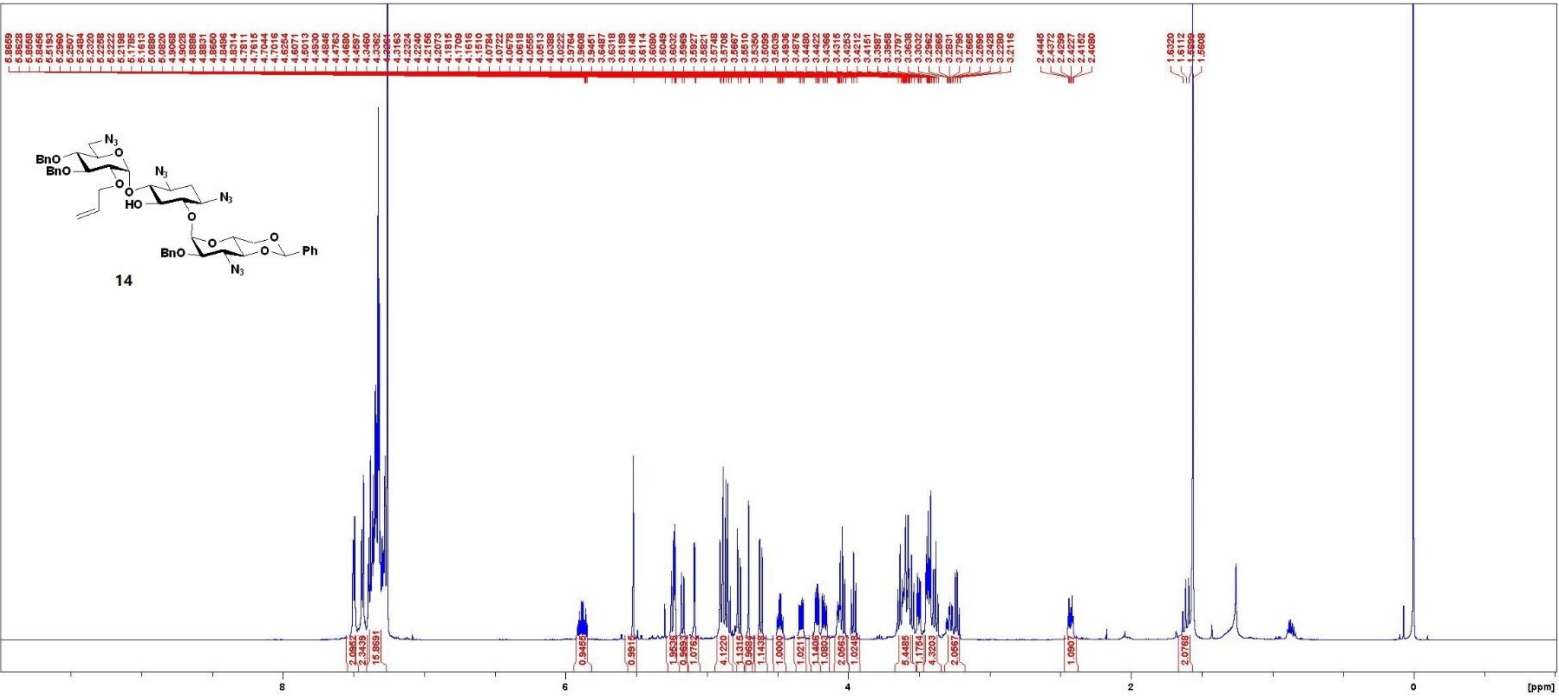

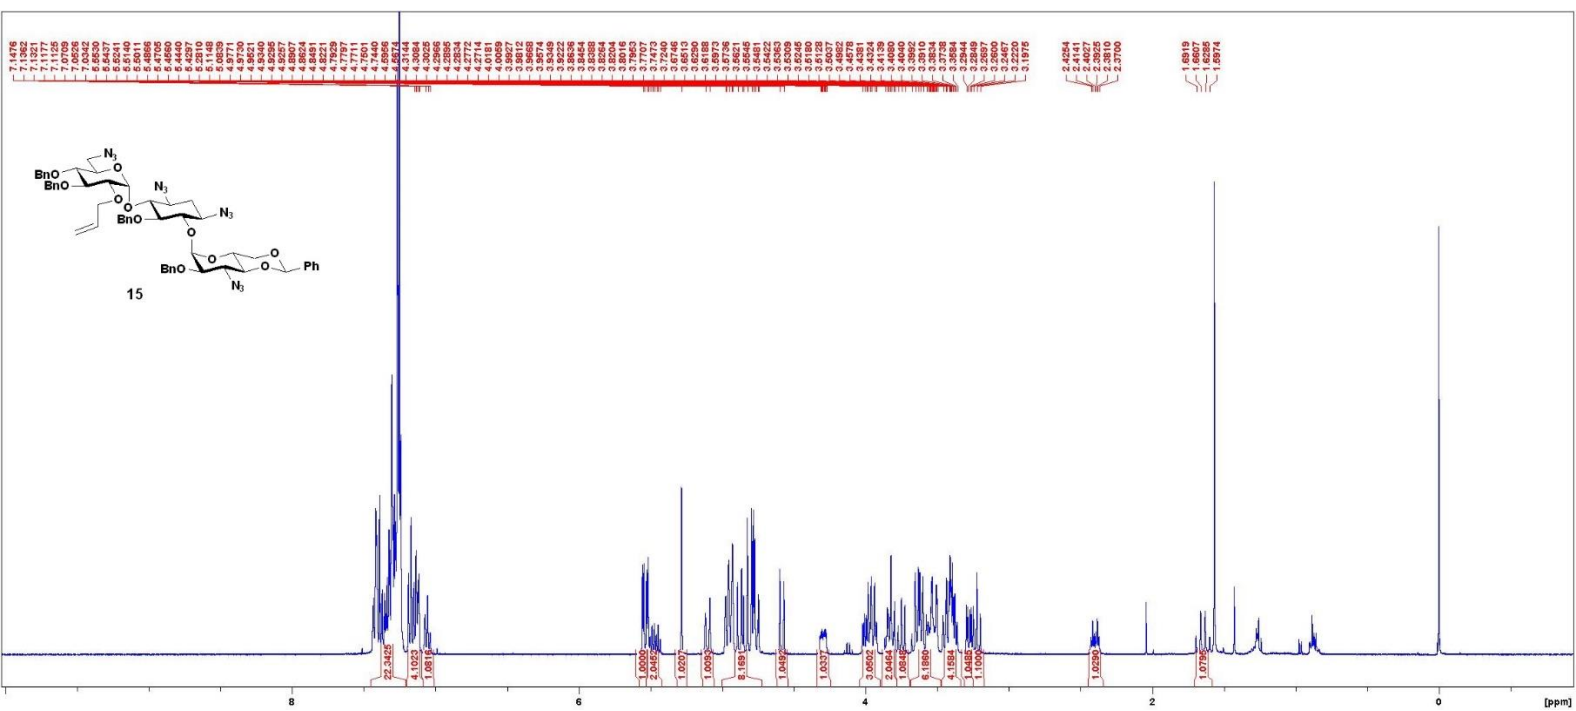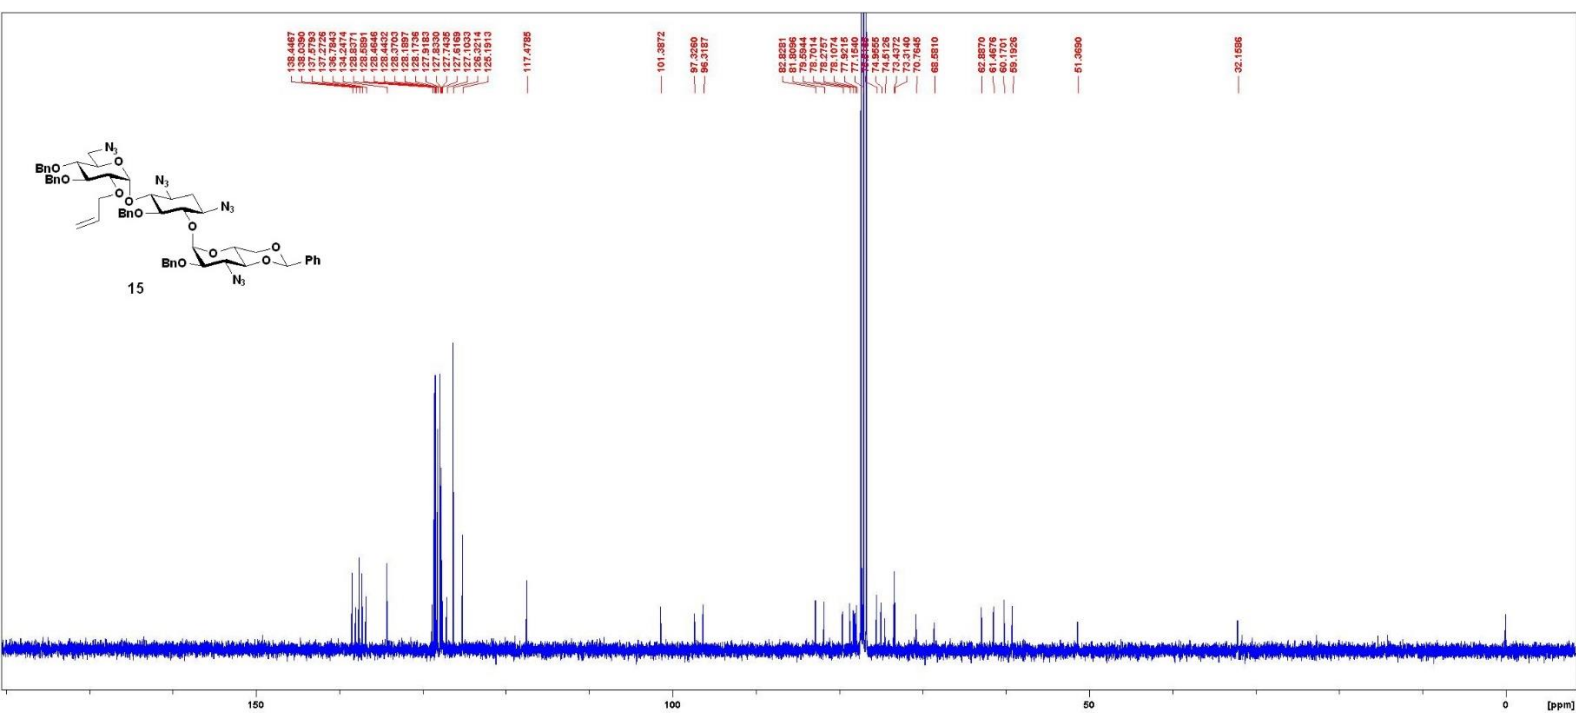





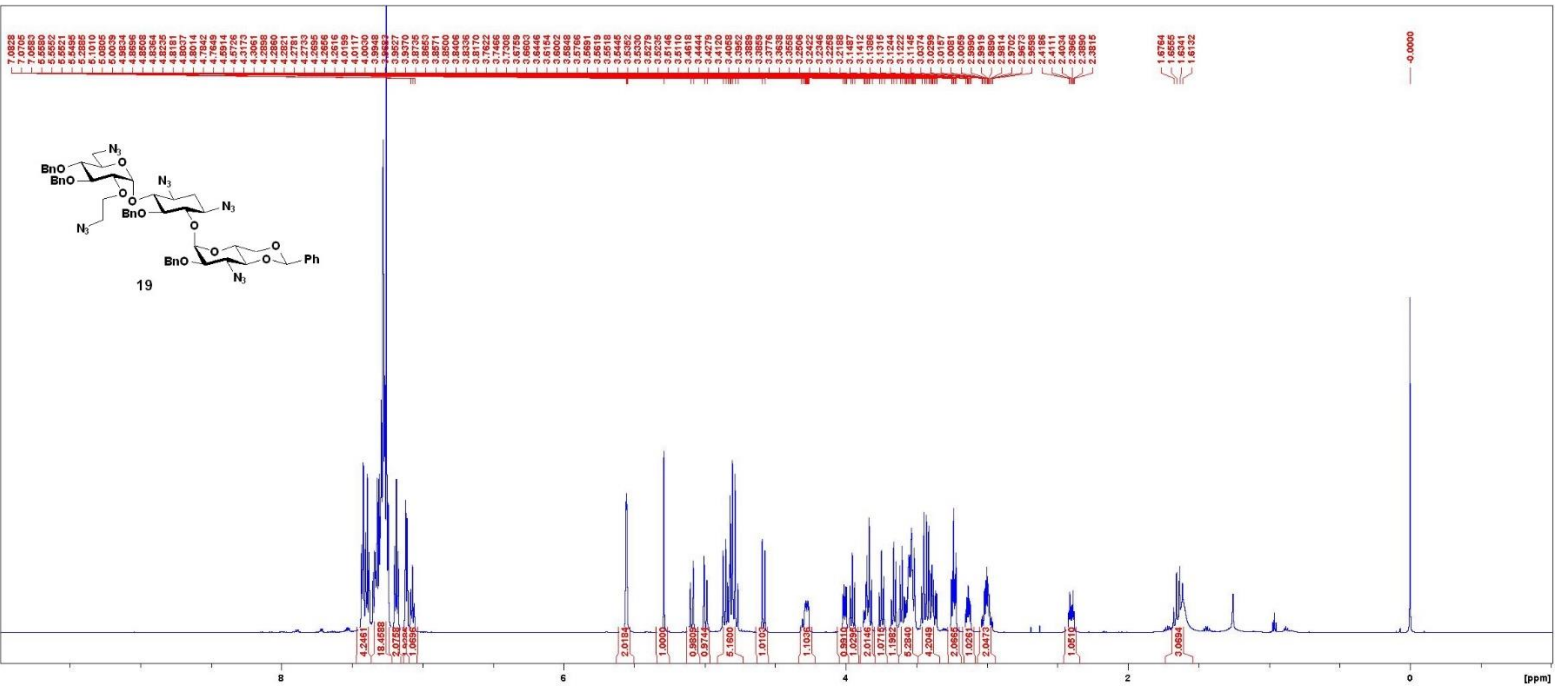









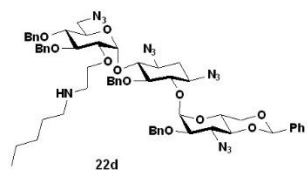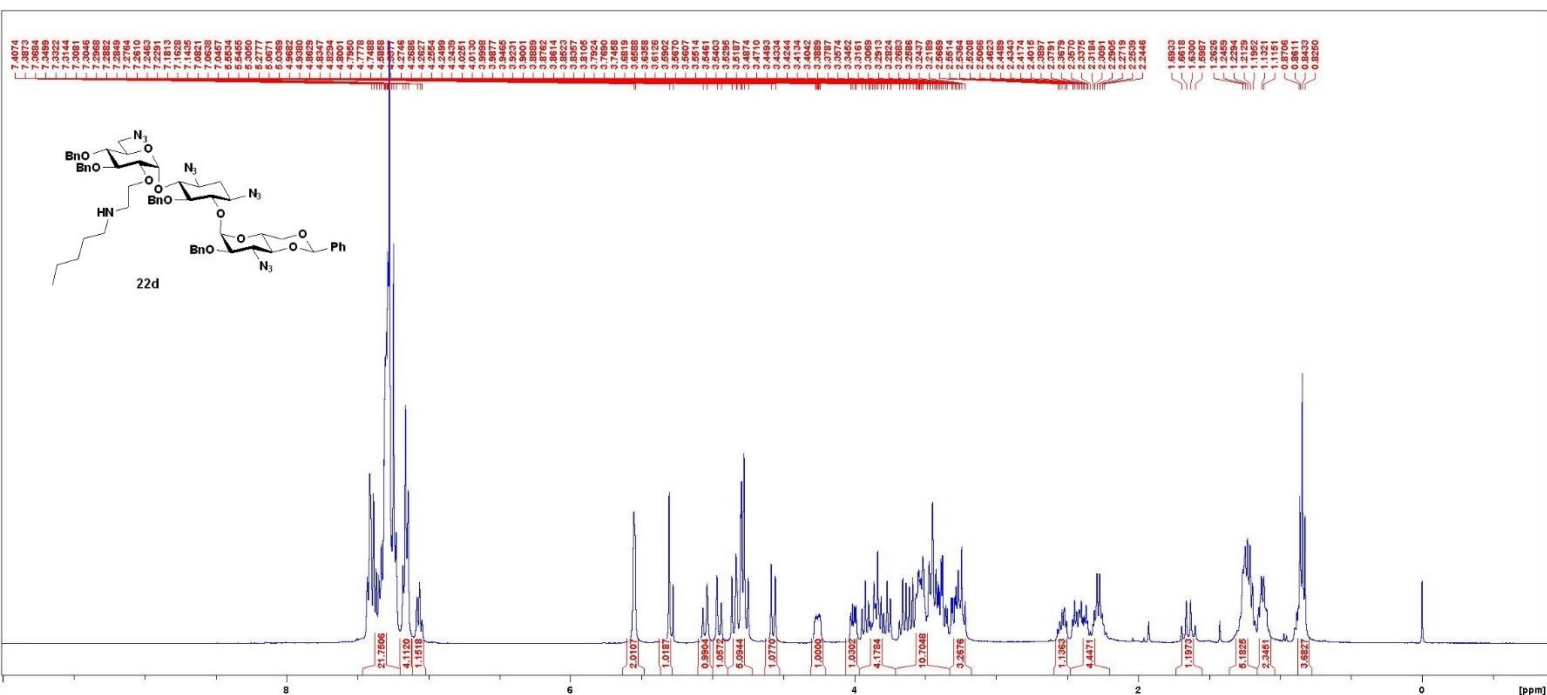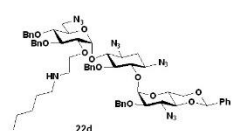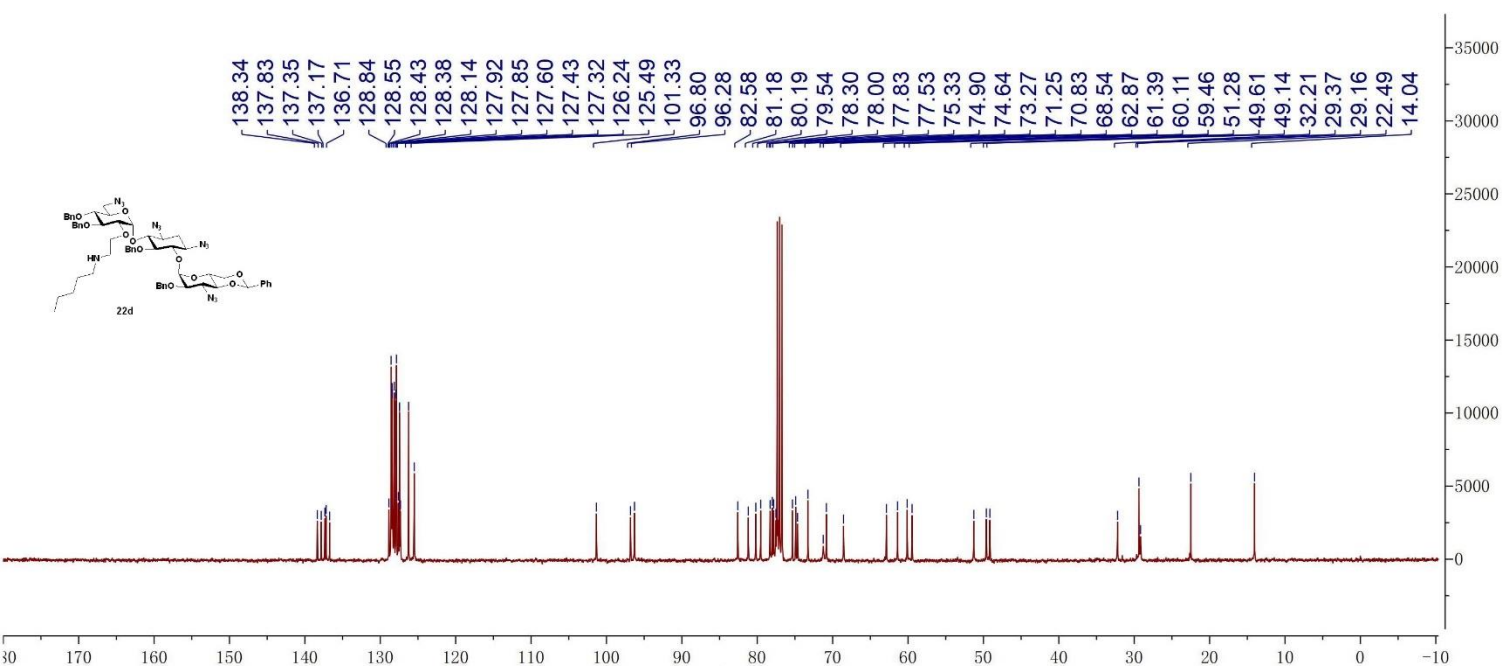



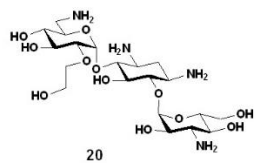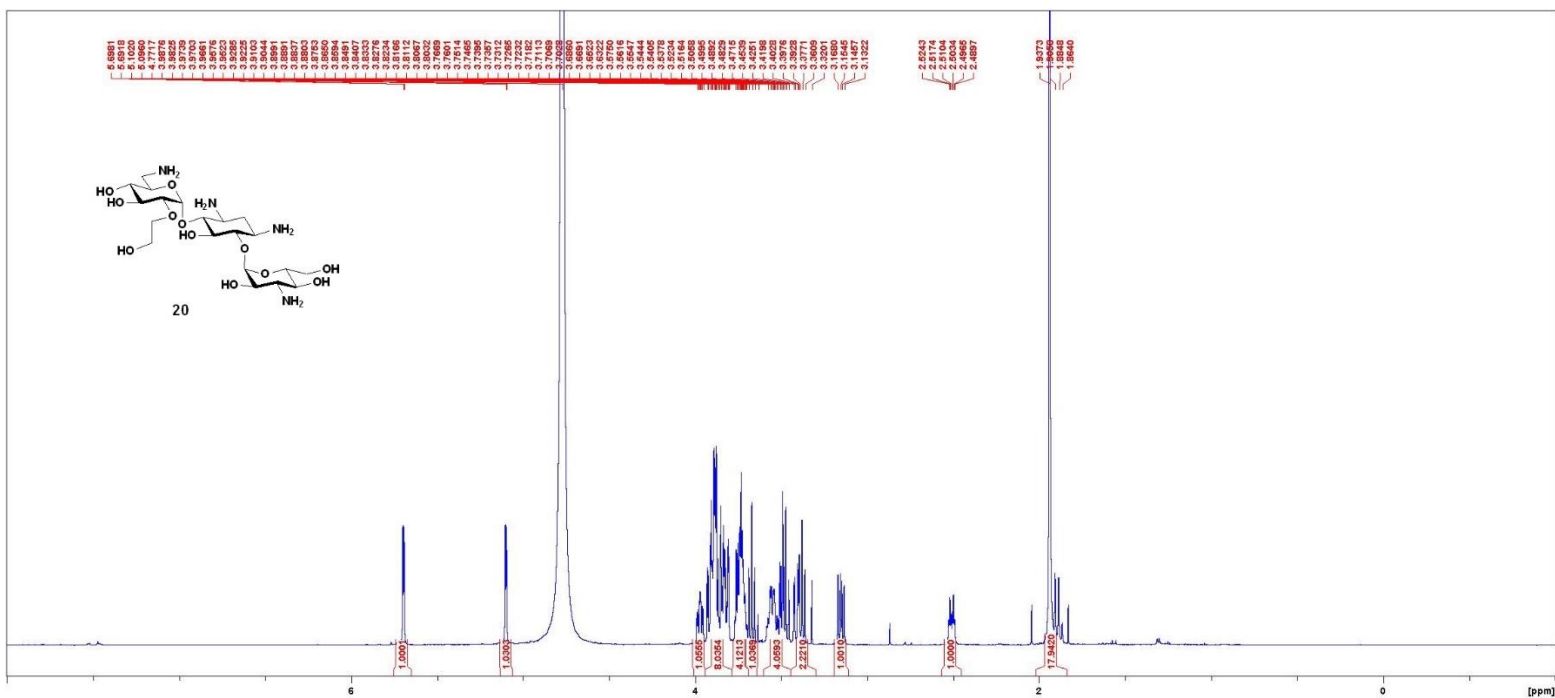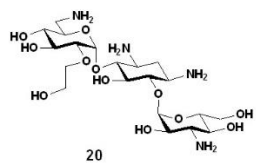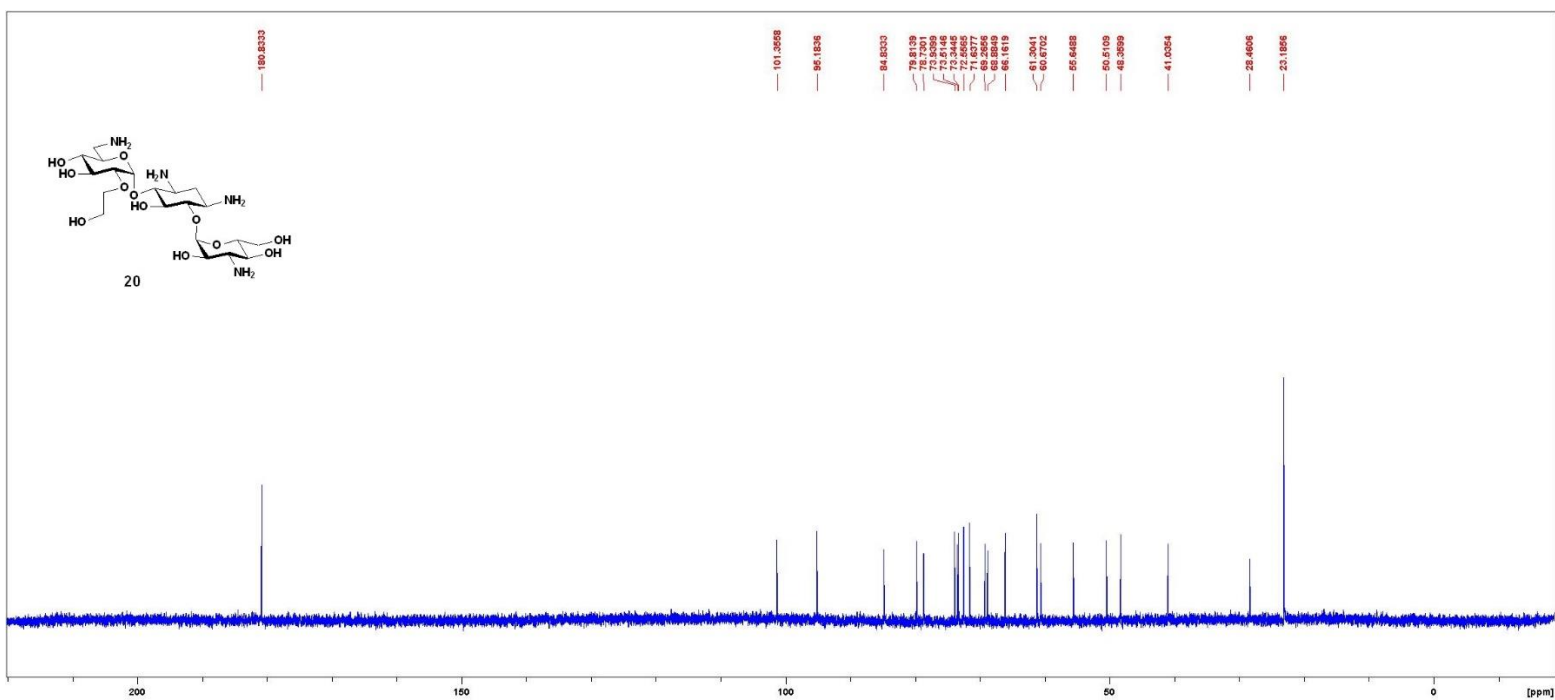



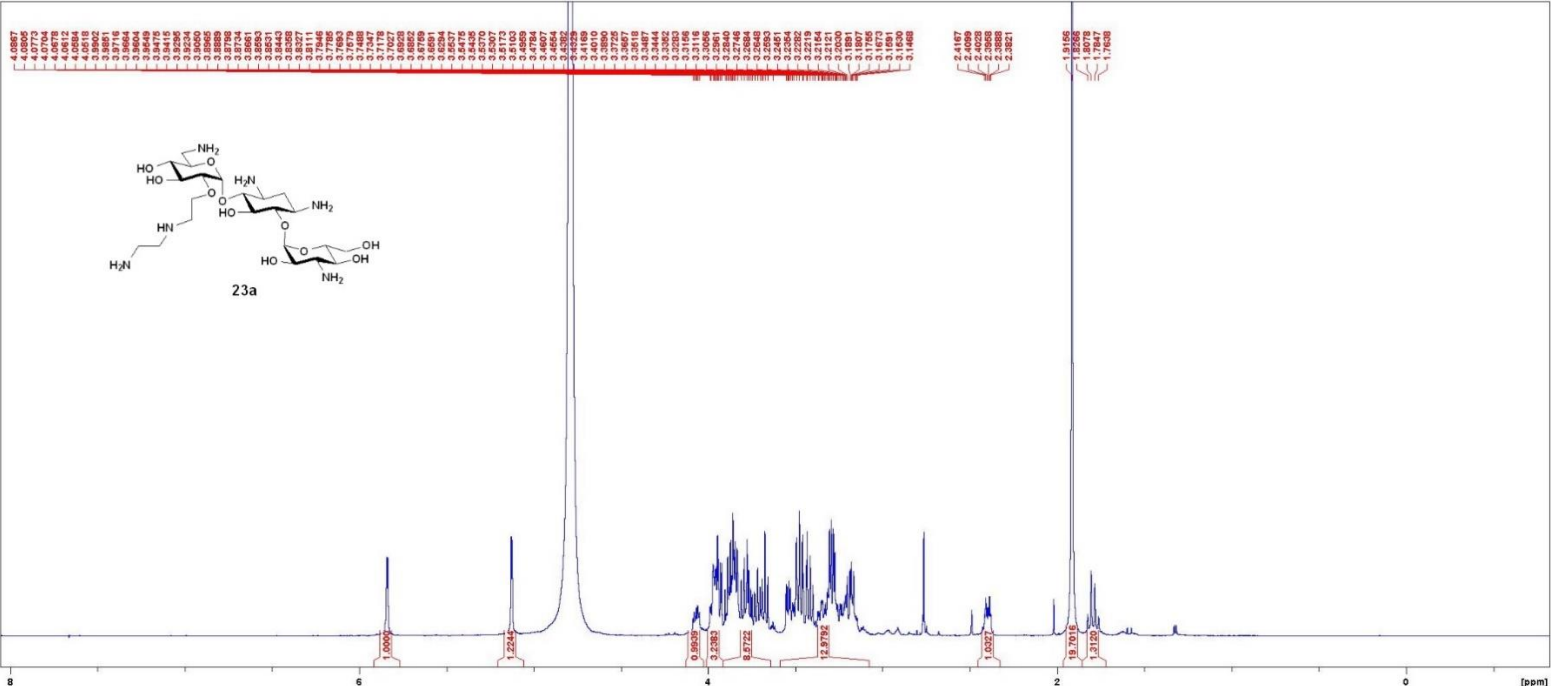

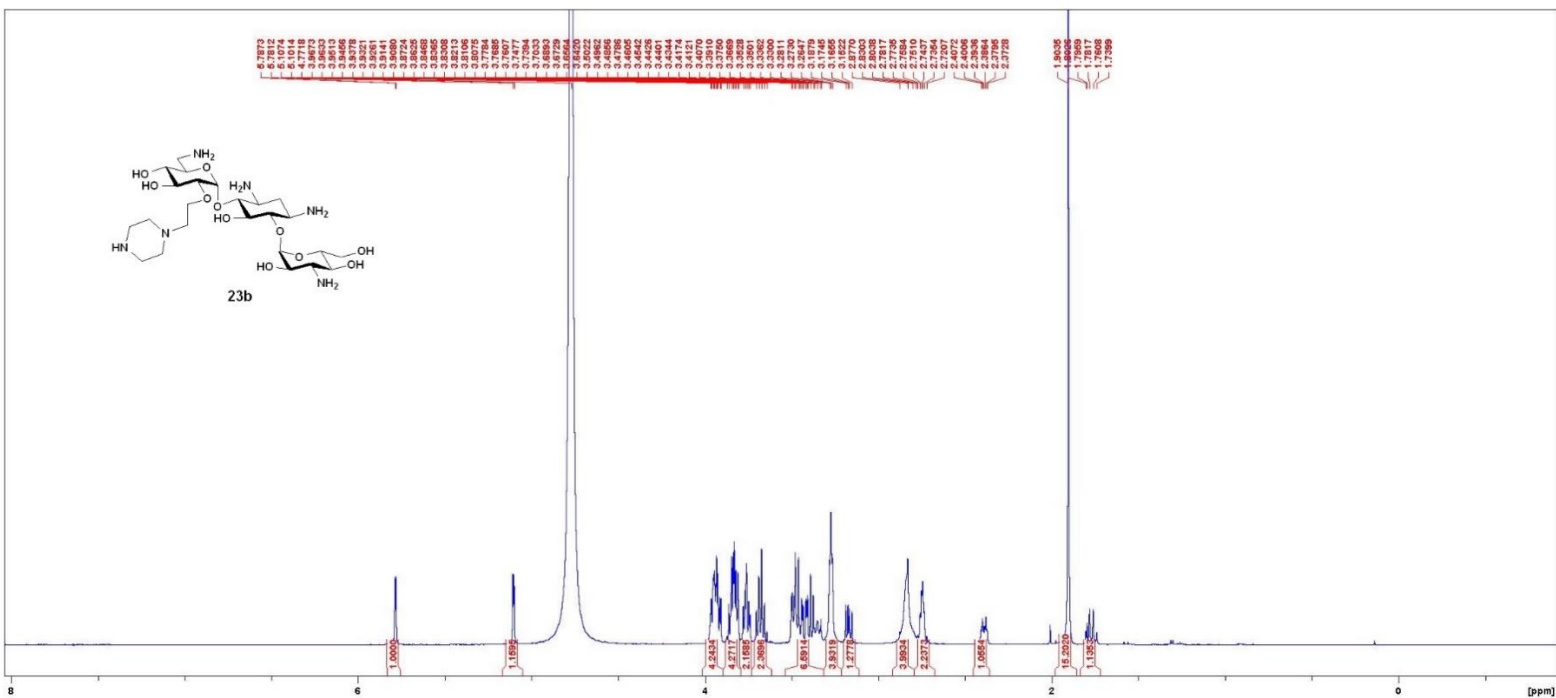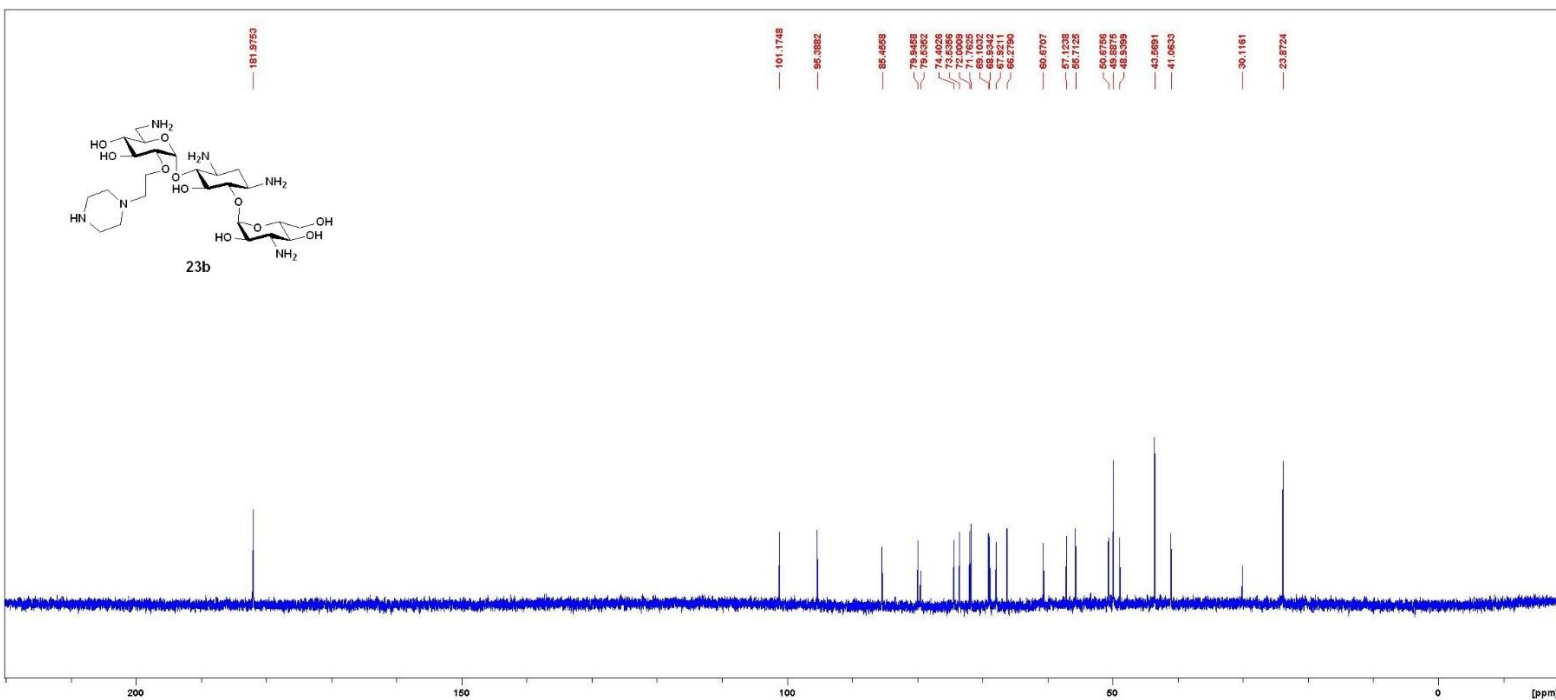

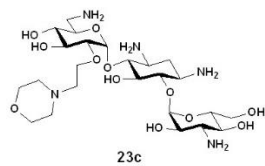

23c

5.8840  
5.8879  
5.1109  
4.1884  
4.1815  
4.1800  
4.1800  
4.0163  
3.9453  
3.9763  
3.9587  
3.9484  
3.9423  
3.9289  
3.9211  
3.9119  
3.8902  
3.8853  
3.8778  
3.8628  
3.8530  
3.7838  
3.7681  
3.7577  
3.7285  
3.6877  
3.6630  
3.6780  
3.6686  
3.6526  
3.6463  
3.6117  
3.5330  
3.5130  
3.4888  
3.4721  
3.4544  
3.4278  
3.4449  
3.4135  
3.4063  
3.3081  
3.2532  
3.1827  
3.1708

2.5117  
2.5097  
2.4977  
2.4908

1.9715  
1.9602  
1.9088

6

4

0

[ppm]

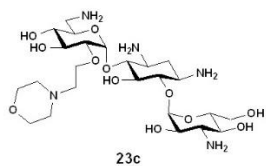

23c

180.2582

100.5616

94.5700

84.0941

78.8619

76.7910

72.8791

71.0508

68.5289

66.5351

63.3771

62.5986

59.8338

56.1828

54.8812

51.7857

49.5844

48.3378

40.2190

27.9049

22.5884

200

150

100

50

0

[ppm]



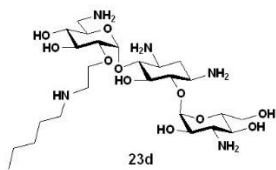

23d

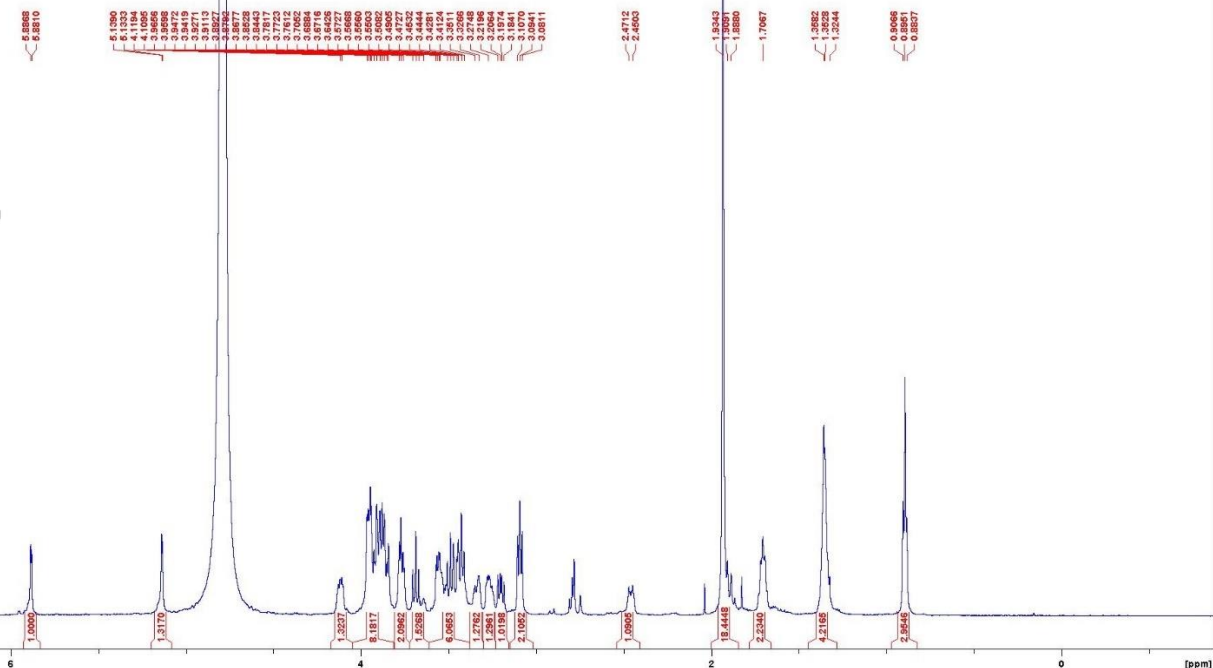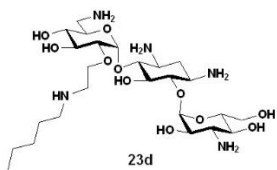

23d

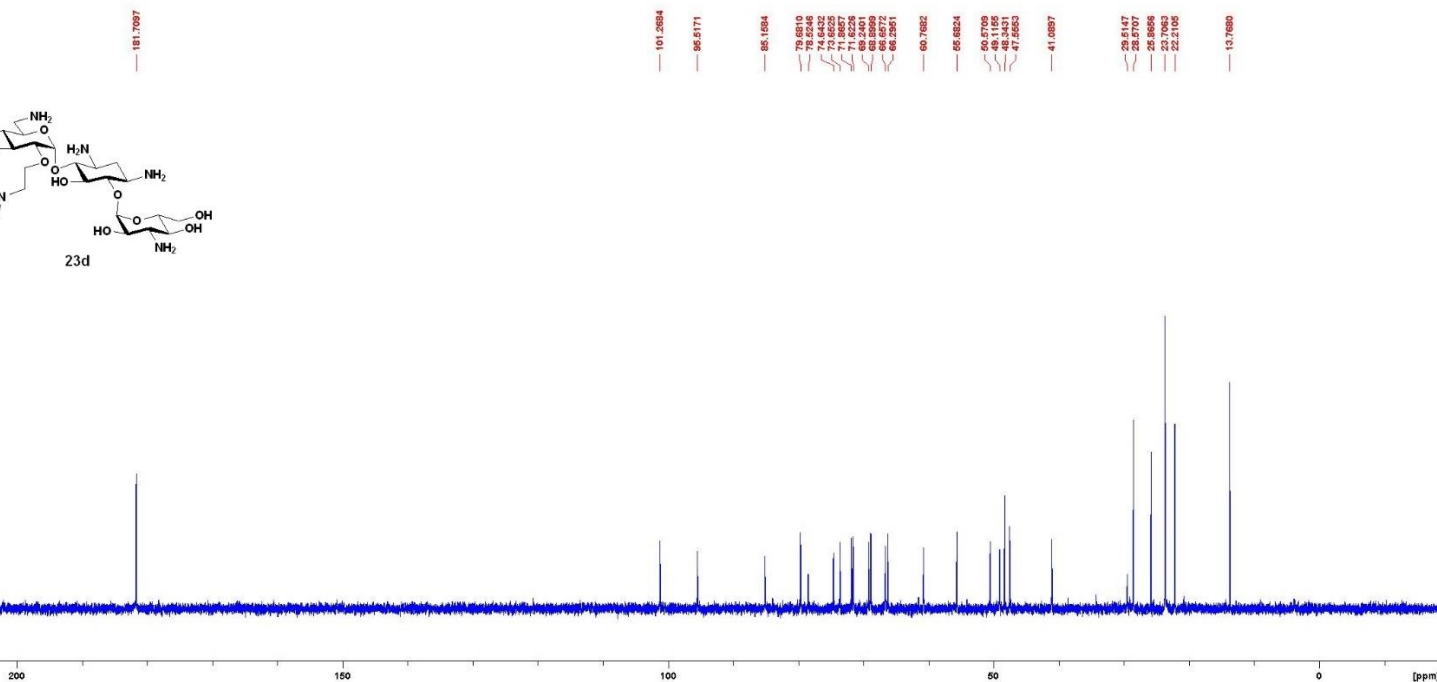

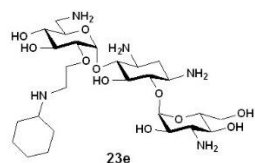

23e

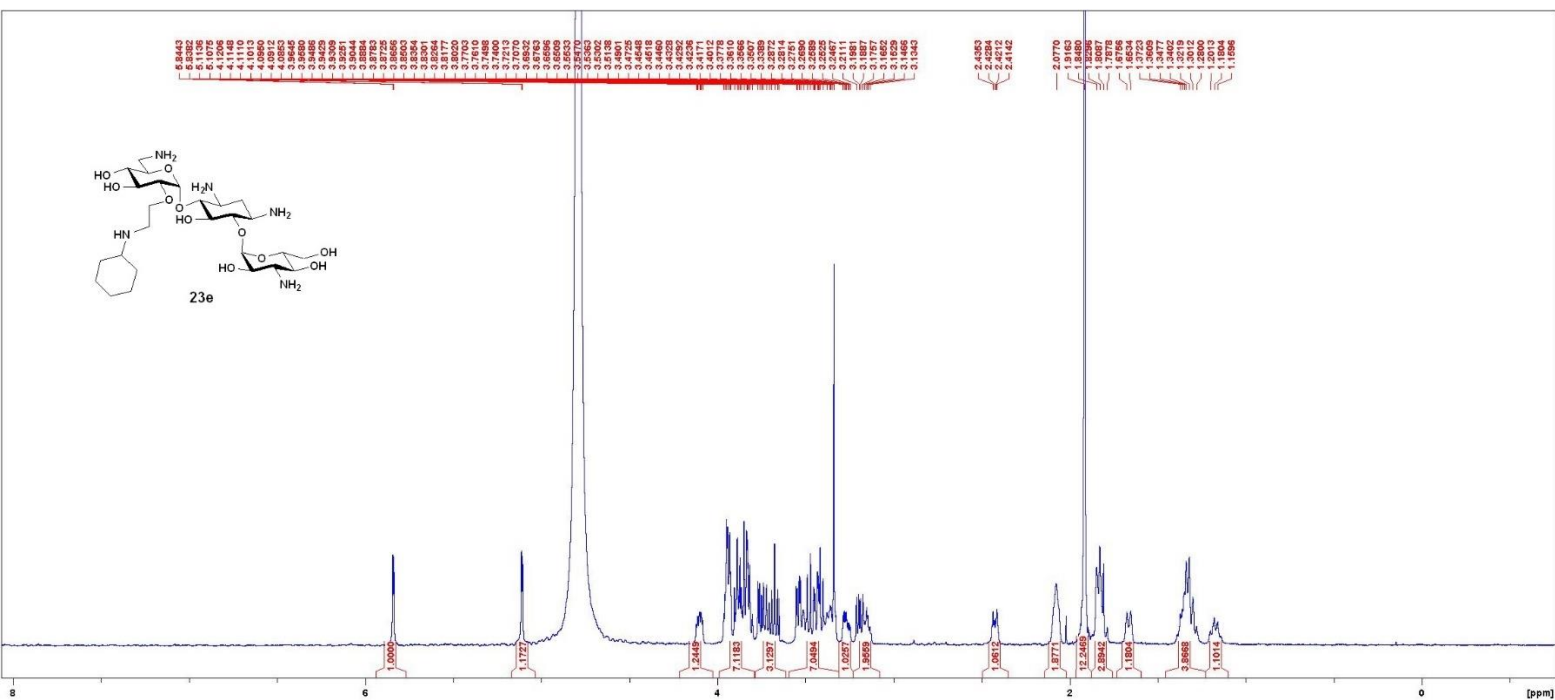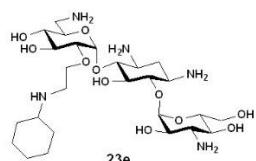

23e

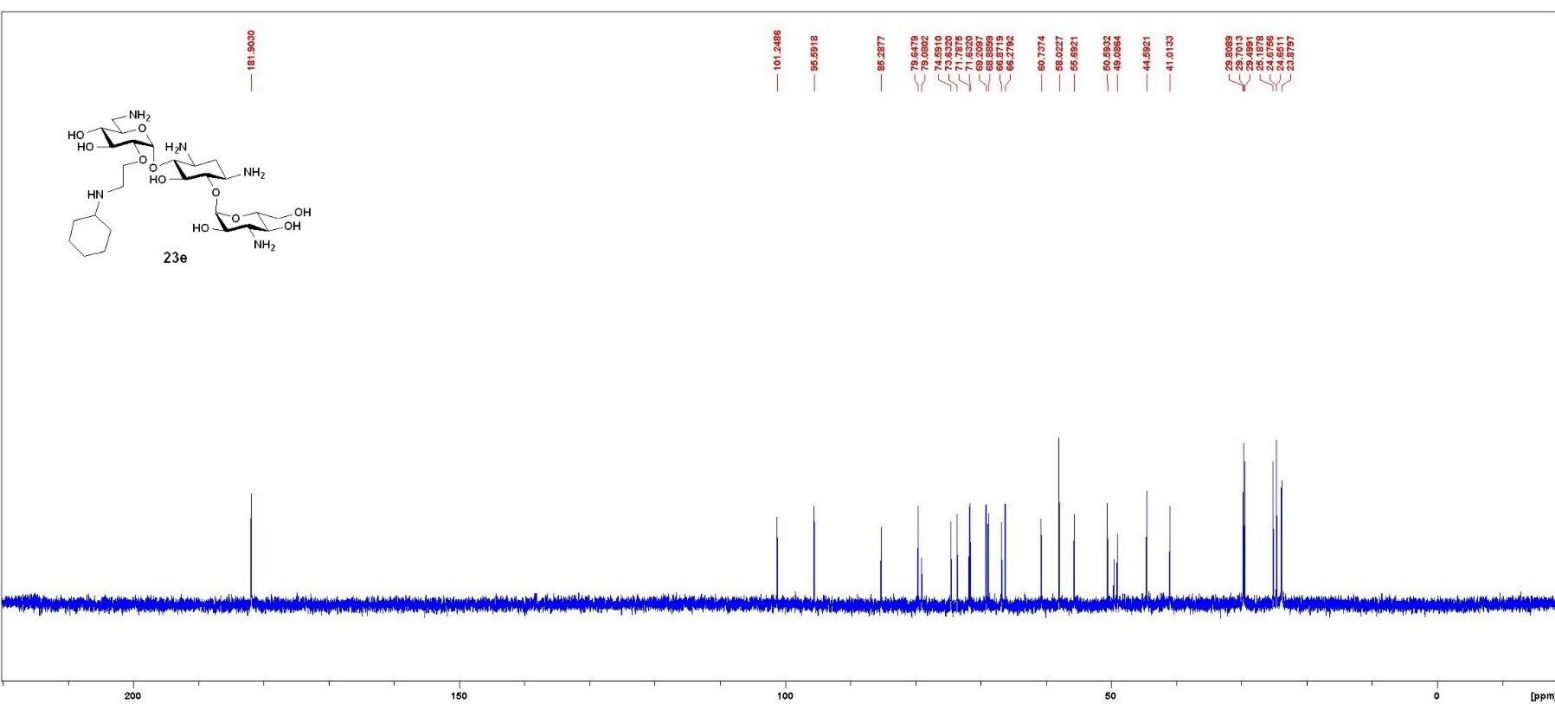

Supplement: s1 [file s1]
